# Supplementary material
Source: publisher figshare collection journal article supplement (https://sage.figshare.com/ndownloader/files/21146088)
Supplement: Supplementary file 1 [file 21146088]

## Sheet: Sheet1
Female
Year	Pathology	Cytology	Imaging,Surgery and Biochemistry	Clinical Only
1973	44	0	18	8
1974	77.5862	0	6.89655	1.72414
1975	53.5714	0	23.2143	1.78571
1976	55.5556	0	18.5185	0
1977	54.8387	0	27.4194	0
1978	52.7778	0	20.8333	1.38889
1979	65.7895	0	13.1579	3.94737
1980	62.3529	0	14.1176	4.70588
1981	52.2727	0	19.3182	2.27273
1982	54.4554	0.990099	14.8515	0
1983	48.9796	1.02041	23.4694	4.08163
1984	56.1983	0	21.4876	2.47934
1985	51.1628	0.775194	17.8295	3.87597
1986	53.2609	0	20.6522	3.80435
1987	45.5621	0.591716	17.1598	3.5503
1988	46.5839	0.621118	37.2671	6.21118
1989	48.2759	0	41.954	7.47126
1990	43.6275	0.490196	47.549	5.39216
1991	46.7662	0	47.2637	5.97015
1992	47.4654	0.460829	47.4654	4.60829
1993	46.5	0	45.5	8
1994	40.0922	0	54.3779	5.52995
1995	43.2692	0.480769	50.4808	5.76923
1996	37.5566	0	58.8235	2.71493
1997	40.3774	0	54.717	4.90566
1998	38.6139	0.330033	58.0858	2.9703
1999	42.7007	0.364964	53.6496	3.28467
2000	39.0093	0.309598	58.5139	2.16718
2001	38.484	0	59.4752	2.04082
2002	36.6154	1.53846	51.6923	10.1538
2003	33.0435	1.15942	50.1449	14.4928
2004	38.6364	0	49.1477	11.3636
2005	36.8421	0.619195	48.2972	13.9319
2006	32.8652	1.1236	52.2472	12.9213
2007	34.9693	0.306748	53.0675	10.7362
2008	38.8724	0	48.9614	10.6825
2009	36.1823	0.2849	53.8462	9.68661
